# Supplementary material for: Conversion of cellulose into lactic acid using zirconium oxide catalysts
Source: Royal Society of Chemistry journal article supplement (doi:10.1039/c6ra28568f), 2017-01-01
Supplement: c6ra28568f1.pdf [file c6ra28568f1.pdf]

## Electronic supplementary information

# Conversion of cellulose into lactic acid using zirconium oxide catalysts

Panya Wattanapaphawong,<sup>a,b</sup> Prasert Reubroycharoen<sup>b,c</sup> and Aritomo Yamaguchi<sup>\*a,d</sup>

<sup>a</sup> *National Institute of Advanced Industrial Science and Technology (AIST), 4-2-1 Nigatake, Miyagino, Sendai 983-8551, Japan*

<sup>b</sup> *Department of Chemical Technology, Faculty of Science, Chulalongkorn University, Pathumwan, Bangkok 10330, Thailand*

<sup>c</sup> *Center of Excellence on Petrochemical and Materials Technology, Chulalongkorn University Research Building, Bangkok 10330, Thailand*

<sup>d</sup> *JST, PRESTO, 4-2-1 Nigatake, Miyagino, Sendai 983-8551, Japan*

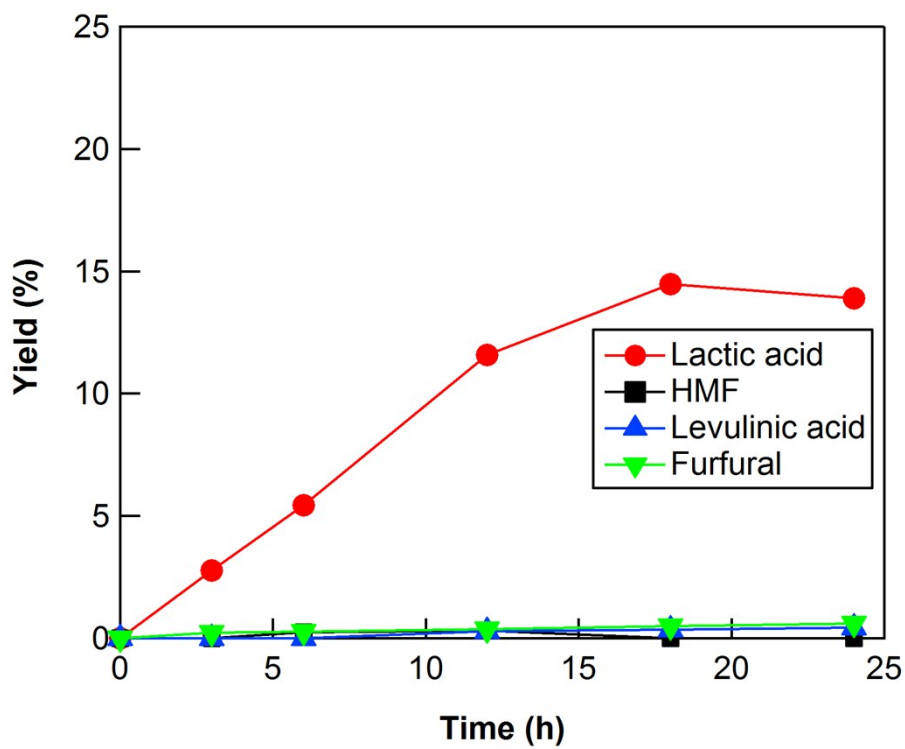

**Fig. S1** Cellulose conversion using a  $\text{ZrO}_2$  catalyst at 453 K as a function of reaction time.

Reaction conditions: 0.5 g ball-milled cellulose, 1 g  $\text{ZrO}_2$  (ZRO-7), 50 g water.

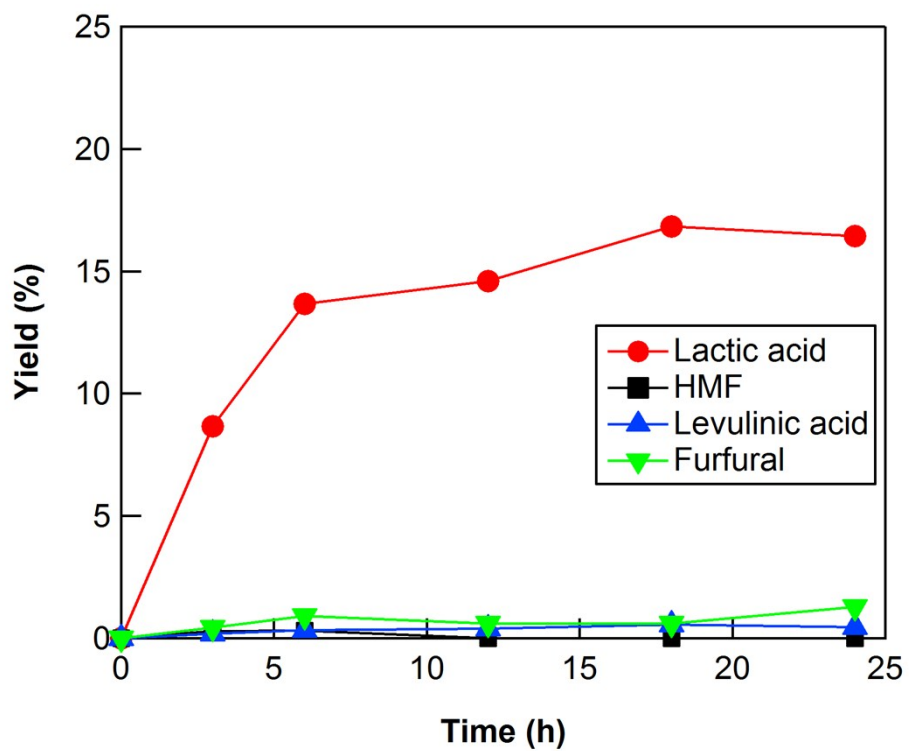

**Fig. S2** Cellulose conversion using a  $\text{ZrO}_2$  catalyst at 463 K as a function of reaction time.

Reaction conditions: 0.5 g ball-milled cellulose, 1 g  $\text{ZrO}_2$  (ZRO-7), 50 g water.

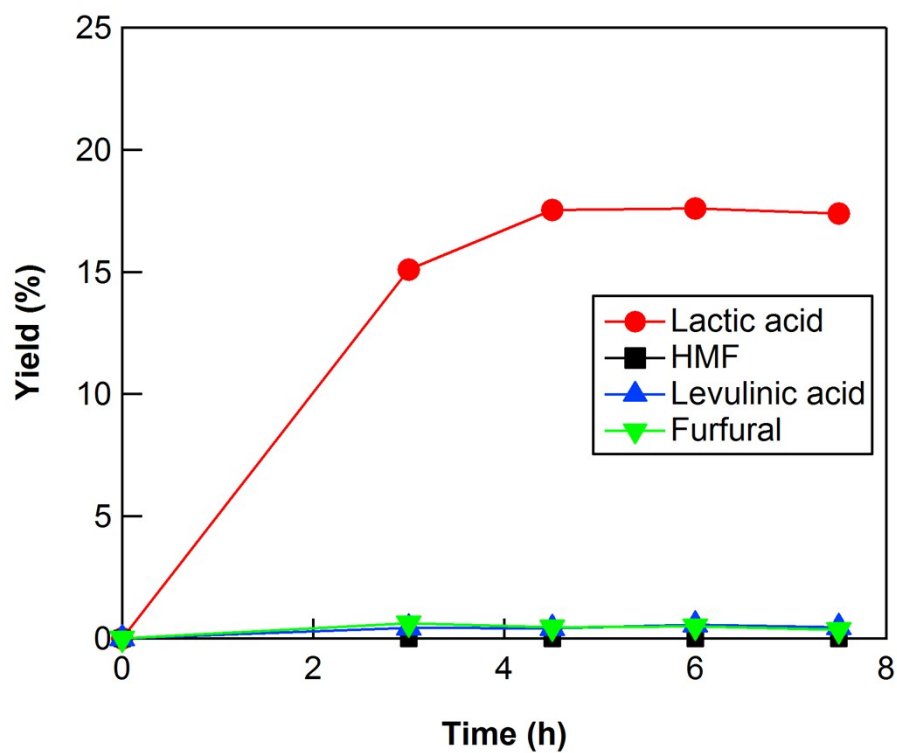

**Fig. S3** Cellulose conversion using a  $\text{ZrO}_2$  catalyst at 483 K as a function of reaction time.

Reaction conditions: 0.5 g ball-milled cellulose, 1 g  $\text{ZrO}_2$  (ZRO-7), 50 g water.

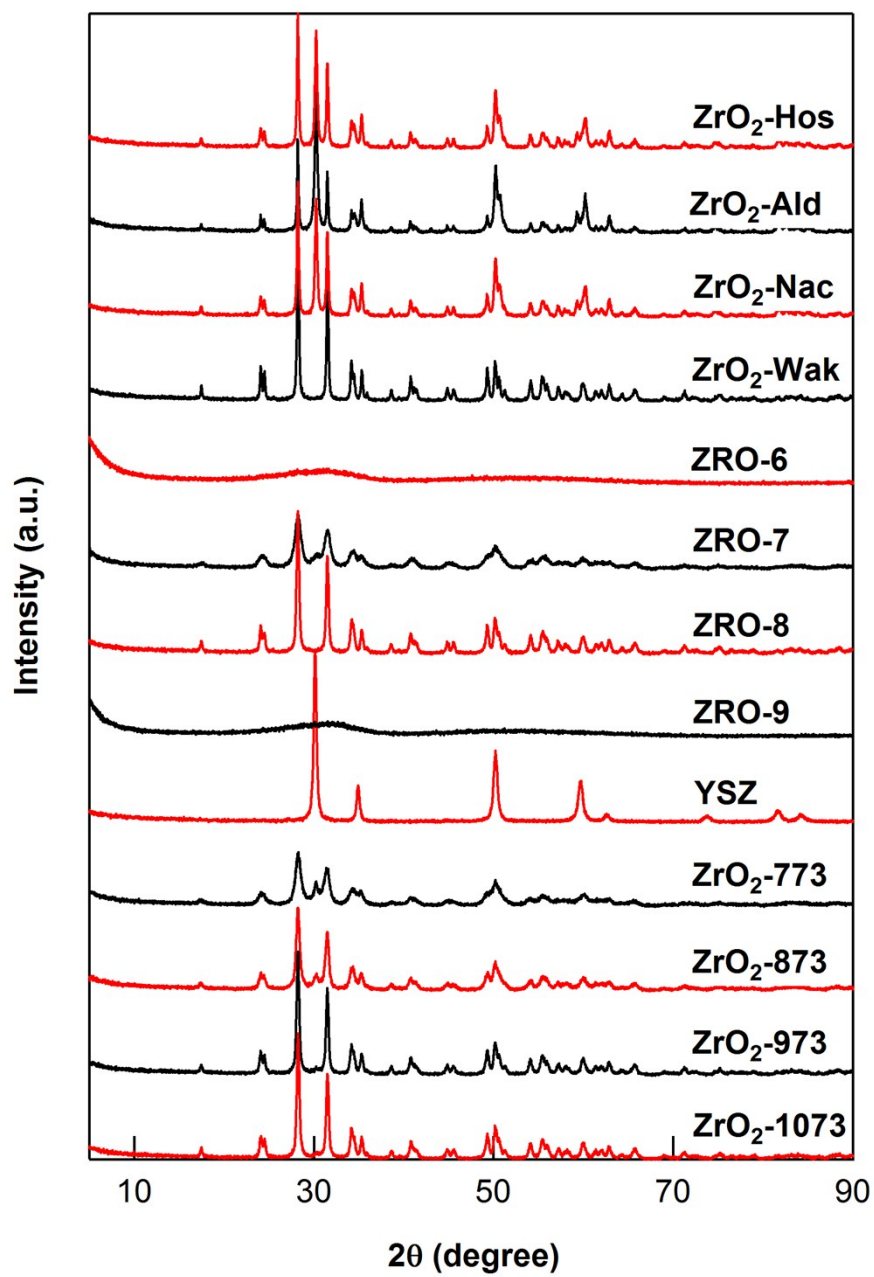

Fig. S4 XRD patterns of ZrO<sub>2</sub> samples.

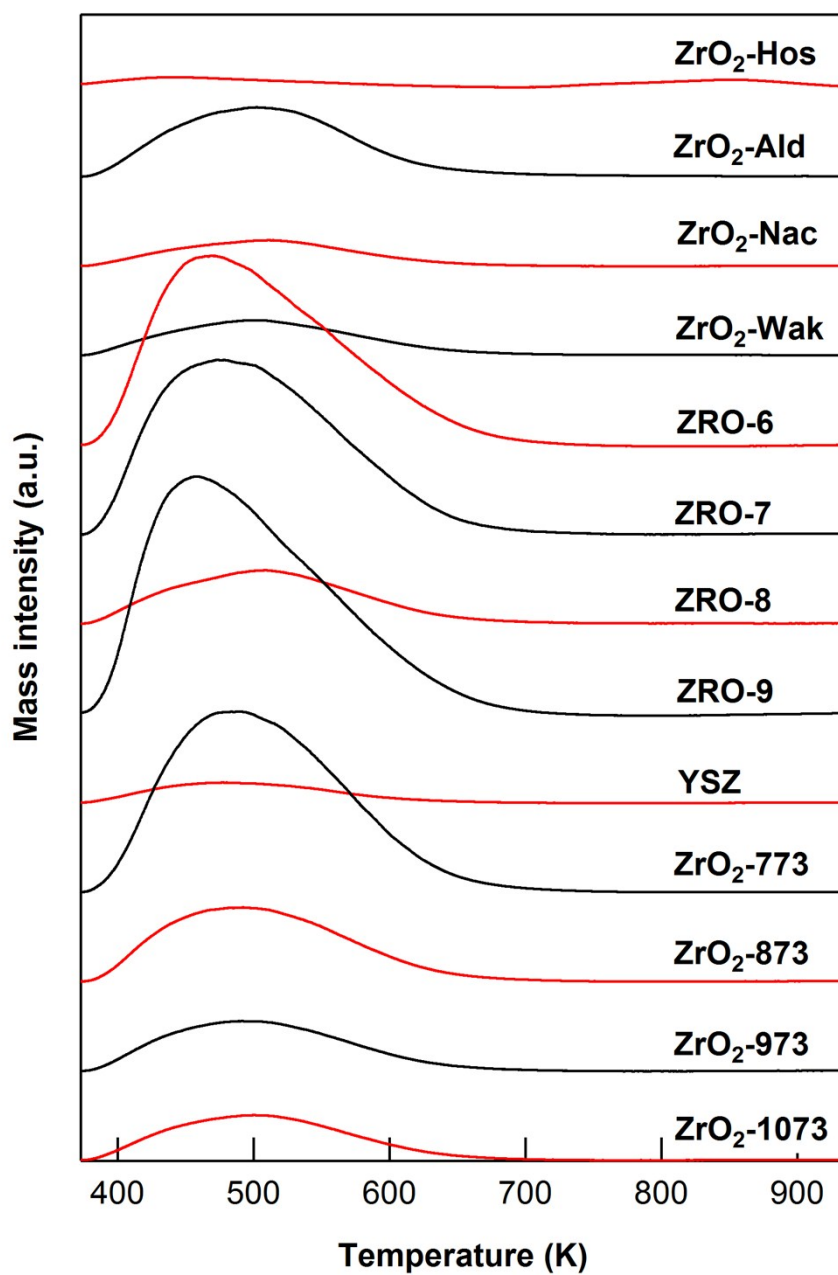

**Fig. S5** Profiles of temperature-programmed desorption of NH<sub>3</sub> on ZrO<sub>2</sub> samples.

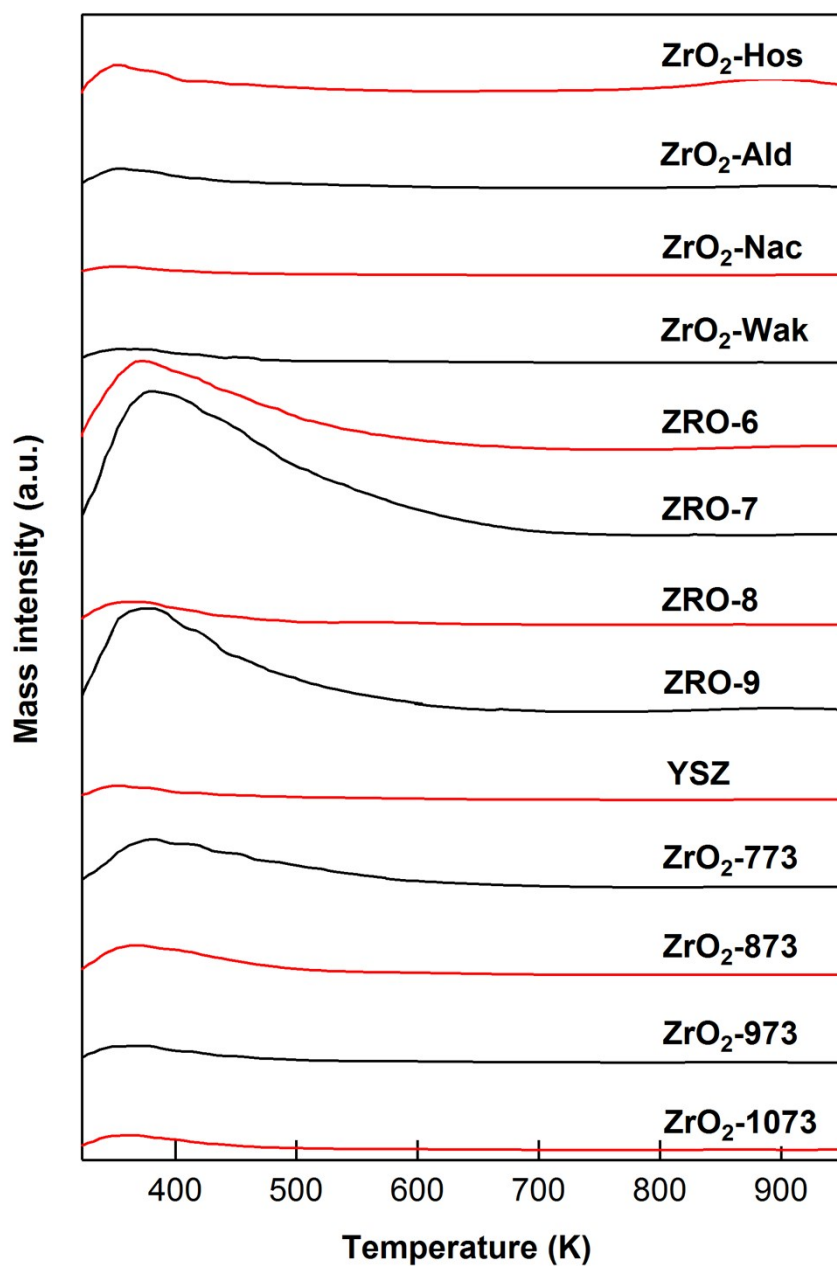

**Fig. S6** Profiles of temperature-programmed desorption of CO<sub>2</sub> on ZrO<sub>2</sub> samples.
